# Supplementary material for: Cytotoxicity of the traditional chinese medicine (TCM) plumbagin in its copper chemistry
Source: Royal Society of Chemistry journal article supplement (doi:10.1039/b910133k), 2009-01-01
Supplement: b910133k.pdf [file b910133k.pdf]

Supplementary Materials for **B910133K**

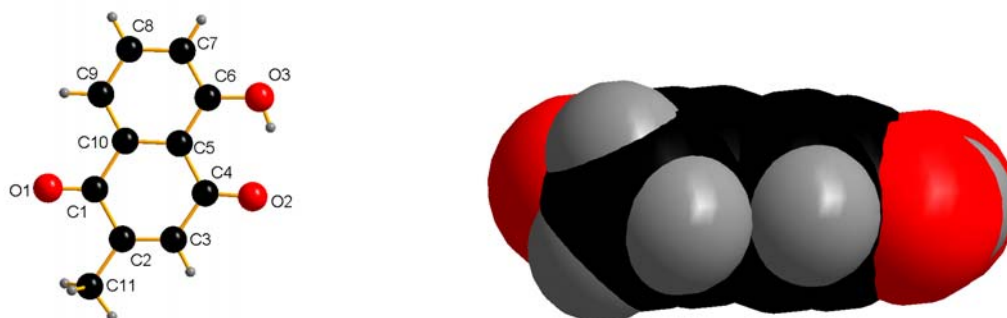

Fig. S1 Crystal structure of PLN (left) and space filling drawing of PLN (right).

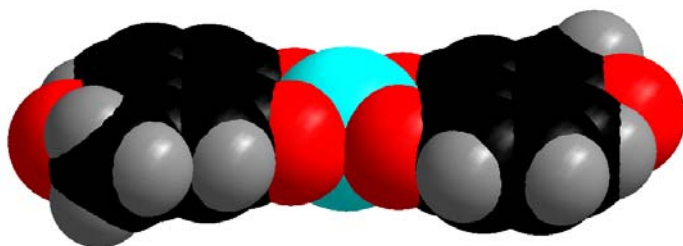

Fig. S2a. Space filling drawing of complex 1.

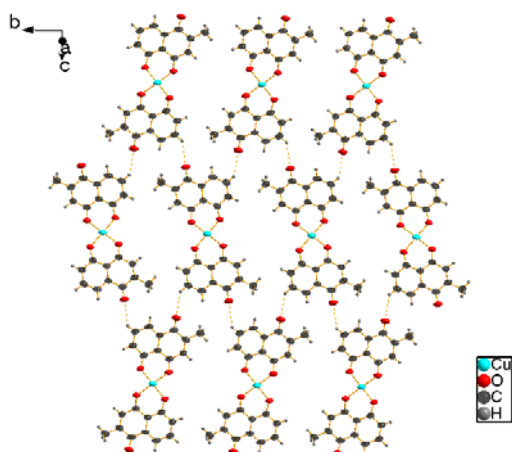

Fig. S2b. Two dimensional network of complex 1 *via* nonclassical hydrogen bonds of C–H...O, view from *a* direction.

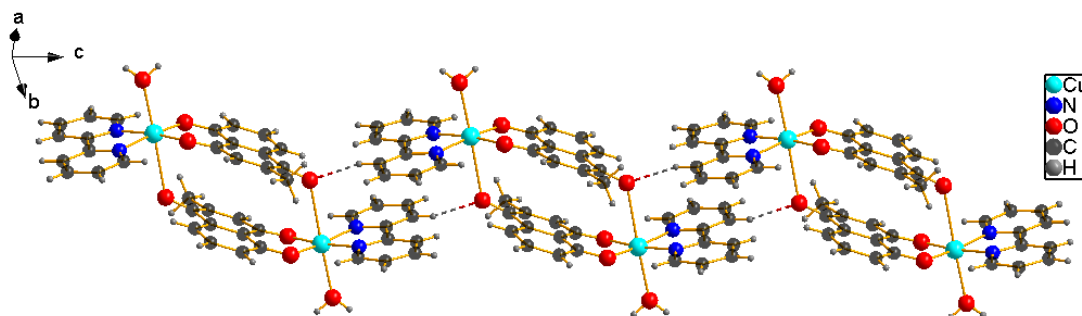

Fig. S3 1D chain structure of complex 2 formed by intermolecular hydrogen bonding.

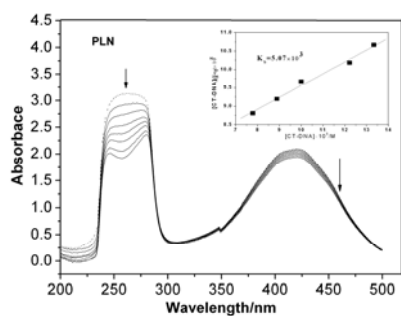

Fig.S4 UV-vis spectra of PLN ( $6.0 \times 10^{-4}$  M) in the absence (----) and presence (—) of increasing amounts of DNA ( $2.1 \times 10^{-3}$  M, 10  $\mu$ l DNA per scan).

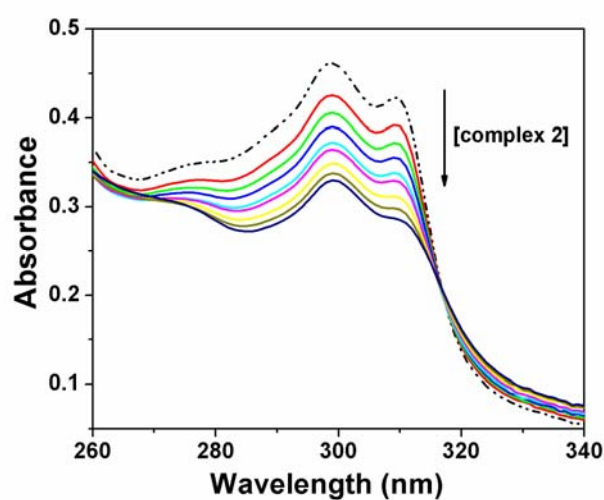

Figure S5. UV-Vis absorption of complex **2** by titration of SDS with increasing concentration. (The concentration of complex **2** is  $2 \times 10^{-5}$  mol/L, while the stock solution of SDS for titration was prepared as  $2 \times 10^{-2}$  mol/L. The dashed line and the solid lines represent the absorption band of complex **2** in the absence and presence of SDS, respectively.)

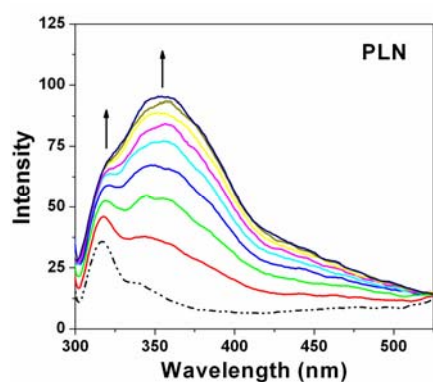

Fig. S6 Emission spectra of PLN ( $1.0 \times 10^{-4}$  M, excited at 282 nm) in the absence (----) and presence (—) of increasing amounts of DNA ( $2.1 \times 10^{-3}$  M, 50  $\mu$ l per scan).

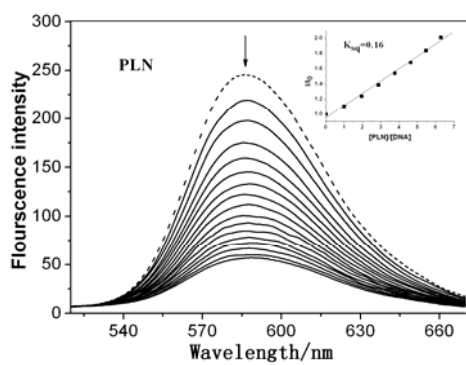

Fig. S7 Emission spectra of DNA–EB system (3 ml solution , [DNA]/[EB] ratio of 6:1 ,excited at 350 nm) in the absence (----) and presence (—) of increasing amounts of PLN. PLN( $6.0 \times 10^{-3}$  M).
